# Supplementary material for: Rhizobium Symbiotic Capacity Shapes Root-Associated Microbiomes in Soybean
Source: PubMed Central journal article supplement (PMC8678110; doi:10.3389/fmicb.2021.709012), 2021-12-02
Supplement: Data_Sheet_1.pdf [file Data_Sheet_1.pdf]

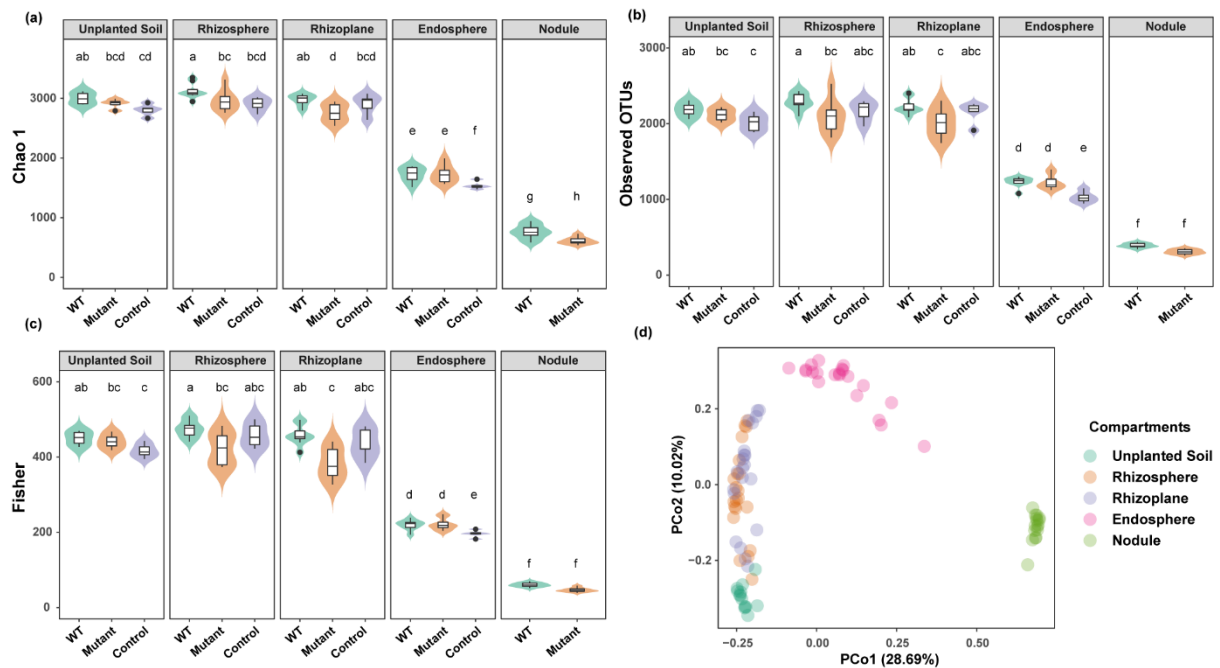

**Fig. S1.  $\alpha$ -diversity and  $\beta$ -diversity among different rhizobial treatments in unplanted soil, rhizosphere, rhizoplane, endosphere and nodule.**  $\alpha$ -diversity among different rhizobial treatments in unplanted soil, rhizosphere, rhizoplane, endosphere and nodule as determined using chao1 (a), observed OTUs (b) and Fisher (c). Treatments are wild type (WT), *noeI* mutant (Mutant) and uninoculated (Control). Different letters represent significant differences among treatments (Dunn's multiple-comparison test,  $p < 0.05$ ). (d)  $\beta$ -diversity principal coordinate analysis (PCoA; weighted UniFrac distances) of unplanted soil, rhizosphere, rhizoplane, endosphere and nodule communities.

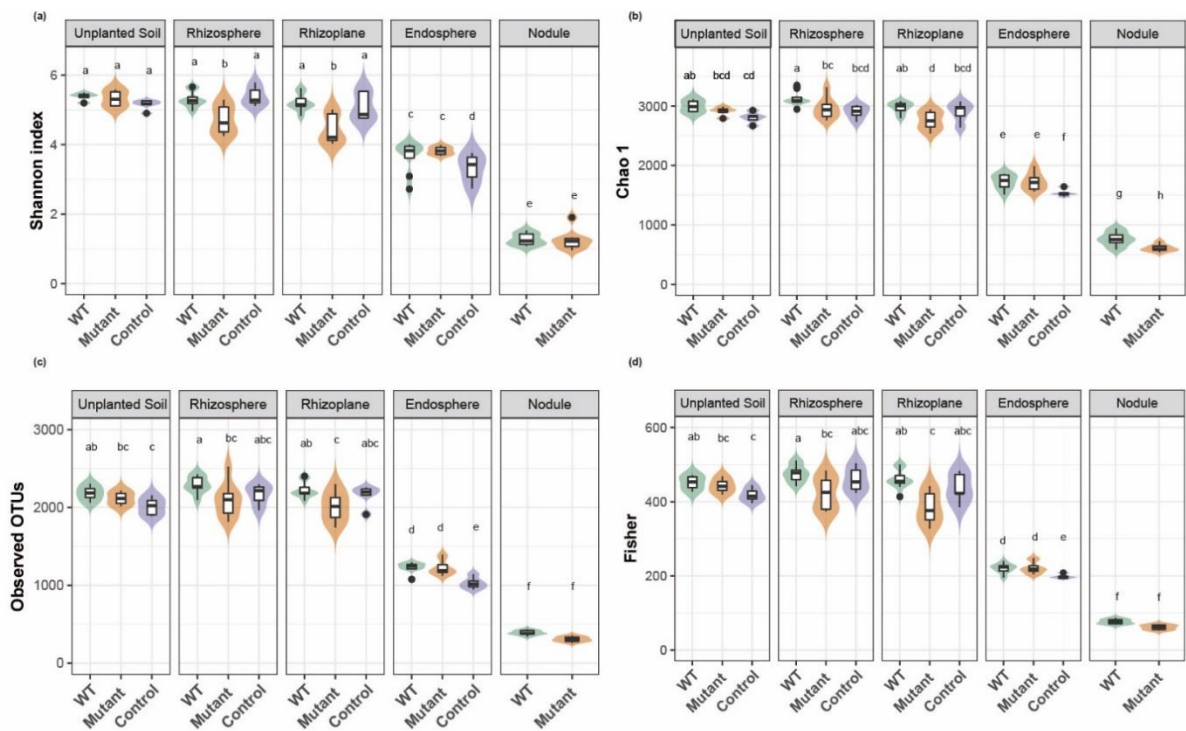

**Fig. S2.  $\alpha$ -diversity (Shannon, Chao1, Observed OTUs and Fisher indices) among different rhizobial treatments in the unplanted soil, rhizosphere, rhizoplane, endosphere, and nodule compartments in the absence of the 16S rRNA sequences of *B. diazoefficiens* USDA 110 (OTU\_77). Treatments are wild-type USDA 110 (WT), *noeI* mutant (Mutant), and not inoculated with rhizobia (Control). Different letters indicate significant differences among treatments (Dunn's multiple-comparison test;  $p < 0.05$ ).**

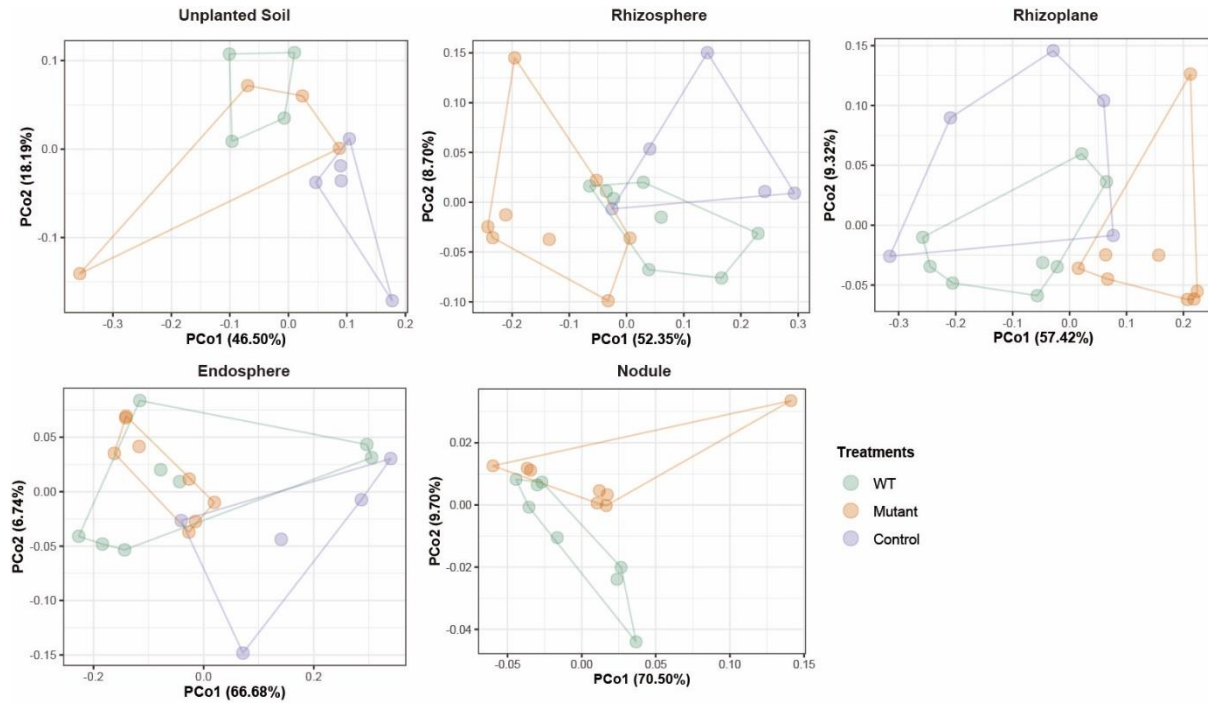

**Fig. S3. Principal coordinate analysis (PCoA; weighted UniFrac distances) of unplanted soil, rhizosphere, rhizoplane, endosphere and nodule communities of soybean among different rhizobial treatments in the absence of the 16S rRNA sequences of *B. diazoefficiens* USDA 110 (OTU\_77). Treatments are wild-type USDA 110 (WT), *noeI* mutant (Mutant), and not inoculated with rhizobia (Control).**

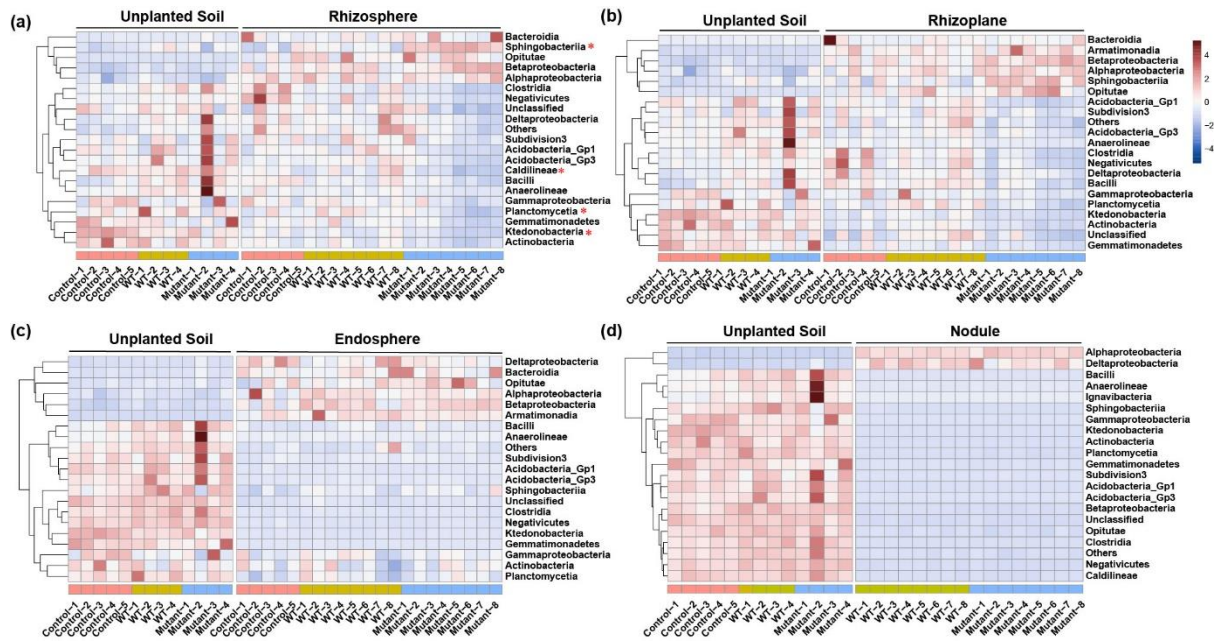

**Fig. S4. Microbial community composition in rhizosphere, rhizoplane, endosphere and nodule.** Microbial community composition (class) in wild type (WT), *noel* mutant (Mutant) and uninoculated (Control) samples using the unplanted soil (subset) compared with rhizosphere (a), rhizoplane (b), endosphere (c) and nodule (d). Color gradation indicates relative abundance, \* represents the classes significantly differed between WT and mutant treatment (Duncan multiple-comparison test,  $p < 0.05$ ).

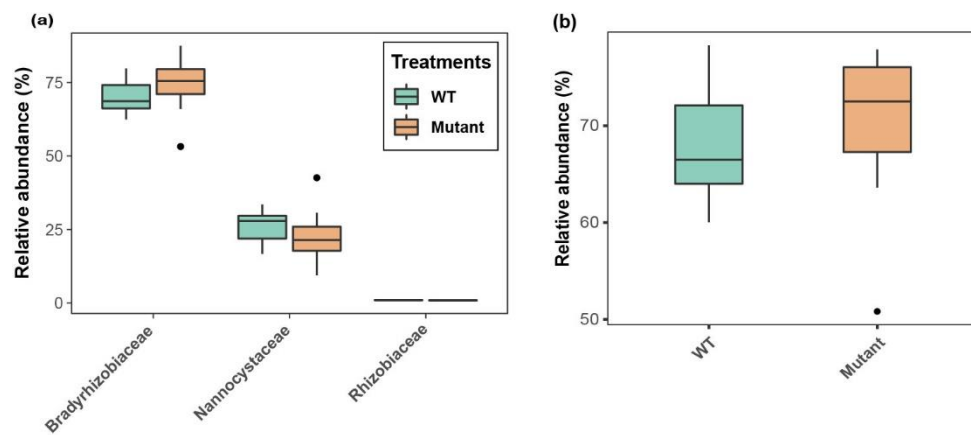

**Fig. S5. The relative abundance of the dominant taxa in the nodule samples. (a)** The relative abundance of the top abundant taxa (at the family level) in the nodule samples treated with WT and mutant rhizobia ( $n = 8$ ). **(b)** The relative abundance of *B. diazoefficiens* USDA 110 in nodule samples treated with WT and mutant rhizobia ( $n = 8$ ).

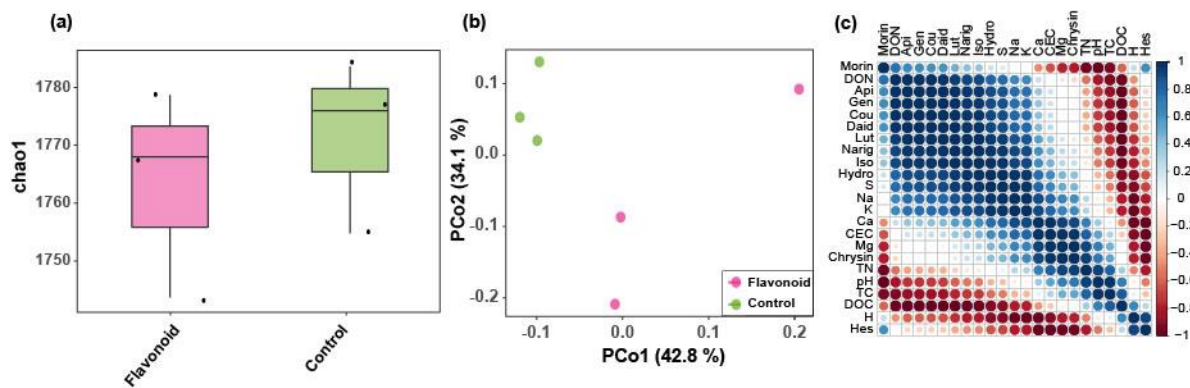

**Fig. S6.  $\alpha$ -diversity and  $\beta$ -diversity in soil inoculated with a mixture of flavonoids and the uninoculated control. (a)  $\alpha$ -diversity (Chao1) in soil inoculated with a mixture of flavonoids (Flavonoid) and the uninoculated control (Control). (b) PCoA (weighted UniFrac distances) of soil treated with flavonoids or water (control). (c) Correlation analysis of the environmental factors, including carbon and nitrogen related indexes (TC, TN, DOC, DON), and alkalinity related parameters (pH, exchangeable base cations, cation exchange capacity) and root exudates: 7, 4'-dihydroxyflavone (Hydro); genistein (Gen); daidzein (Daid); luteolin (Lut); isoliquiritigenin (Iso); apigenin (Api); coumestrol (Cou); naringenin (Narig); hesperetin (Hes); morin and chrysin.**

**Table S1. Mass spectrometry parameters and ion patterns of tested compounds**

| <b>Compound</b>            | <b>Parent<br/>(m/z)</b> | <b>Daughter1<br/>(m/z)</b> | <b>Daughter2<br/>(m/z)</b> | <b>Dwell<br/>(s)</b> | <b>Cone<br/>voltage (V)</b> | <b>Collision<br/>energy1 (eV)</b> | <b>Collision<br/>energy2 (eV)</b> |
|----------------------------|-------------------------|----------------------------|----------------------------|----------------------|-----------------------------|-----------------------------------|-----------------------------------|
| 7, 4'-<br>dihydroxyflavone | 160.9                   | 104.9                      | 132.9                      | 0.025                | 14                          | 22                                | 18                                |
| Chrysin                    | 253.0                   | 142.9                      | 208.9                      | 0.025                | 16                          | 26                                | 22                                |
| Daidzein                   | 253.0                   | 208.1                      | 223.9                      | 0.025                | 16                          | 30                                | 26                                |
| Isoliquiritigenin          | 255.1                   | 119.0                      | 134.9                      | 0.025                | 28                          | 22                                | 16                                |
| Coumestrol                 | 266.9                   | 238.9                      | 266.8                      | 0.025                | 12                          | 24                                | 22                                |
| Apigenin                   | 285.0                   | 120.9                      | 134.9                      | 0.025                | 8                           | 26                                | 22                                |
| Genistein                  | 269.0                   | 132.9                      | 158.9                      | 0.025                | 26                          | 30                                | 30                                |
| Naringenin                 | 271.0                   | 118.9                      | 150.9                      | 0.025                | 32                          | 24                                | 18                                |
| Luteolin                   | 285.0                   | 132.9                      | 150.9                      | 0.025                | 36                          | 34                                | 26                                |
| Morin                      | 301.0                   | 124.9                      | 150.9                      | 0.025                | 8                           | 18                                | 18                                |
| Hesperetin                 | 301.1                   | 163.9                      | 286.0                      | 0.025                | 16                          | 24                                | 16                                |
| Genistein-D2               | 271.0                   | 134.9                      |                            | 0.025                | 8                           | 32                                |                                   |

**Table S2. The effects of environmental variables on the microbial community assembly revealed by permutational multivariate analysis of variance (PERMANOVA).**

|                                        | SS <sup>c</sup> | F. Model | Variation (%) <sup>d</sup> | <i>p</i> value <sup>e</sup> |
|----------------------------------------|-----------------|----------|----------------------------|-----------------------------|
| Treatments                             | 2.206           | 6.596    | 12.91                      | 0.001***                    |
| Compartments                           | 6.671           | 13.928   | 39.04                      | 0.001***                    |
| Treatments × Compartments <sup>a</sup> | 3.134           | 6.740    | 18.34                      | 0.001***                    |
| Rhizosphere -Treatments <sup>b</sup>   | 0.312           | 5.969    | 39.87                      | 0.001***                    |
| Rhizoplane -Treatments                 | 0.323           | 5.263    | 36.90                      | 0.003**                     |
| Endosphere -Treatments                 | 0.226           | 3.101    | 25.63                      | 0.03*                       |
| Nodule -Treatments                     | 0.007           | 0.817    | 5.51                       | 0.398                       |
| Unplanted Soil -Treatments             | 0.114           | 1.662    | 24.95                      | 0.078                       |

<sup>a</sup> “×” indicates interactions between these environmental variables.

<sup>b</sup> “-” represents the effect of treatments in each compartment on the microbial community assembly.

<sup>c</sup> SS, sums of squares.

<sup>d</sup> Variation was based on weighted UniFrac distances.

<sup>e</sup> *p* value based on PERMANOVA (999 permutations).

\* *p* < 0.05

\*\* *p* < 0.01

\*\*\* *p* < 0.001.



**Table S3. Topological features of subnetworks where ‘WT’ represents the USDA 110 wild type treatment and ‘Mutant’ represents the *noeI* mutant treatment.**

| Topological features       | Bulk Soil | Rhizosphere |        | Rhizoplane |        | Endosphere |        | Nodule |        |
|----------------------------|-----------|-------------|--------|------------|--------|------------|--------|--------|--------|
|                            |           | WT          | Mutant | WT         | Mutant | WT         | Mutant | WT     | Mutant |
| Modularity                 | 0.455     | 0.508       | 0.570  | 0.511      | 0.571  | 0.528      | 0.540  | 0.632  | 0.642  |
| Number of vertices         | 302       | 282         | 279    | 283        | 279    | 276        | 266    | 212    | 203    |
| Number of edges            | 3426      | 2490        | 2259   | 2501       | 2263   | 2298       | 1990   | 1223   | 1096   |
| Connectance                | 0.075     | 0.063       | 0.058  | 0.063      | 0.058  | 0.061      | 0.056  | 0.055  | 0.053  |
| Average degree             | 22.689    | 17.660      | 16.194 | 17.675     | 16.222 | 16.652     | 14.962 | 11.538 | 10.798 |
| Average path length        | 3.369     | 3.862       | 4.663  | 3.861      | 4.663  | 3.867      | 4.680  | 4.207  | 5.590  |
| Diameter                   | 9.000     | 26.681      | 35.577 | 26.681     | 35.577 | 26.681     | 35.577 | 26.897 | 39.990 |
| Clustering coefficient     | 0.513     | 0.551       | 0.572  | 0.553      | 0.572  | 0.519      | 0.537  | 0.527  | 0.570  |
| Number of clusters         | 2         | 4           | 3      | 4          | 3      | 4          | 3      | 4      | 3      |
| Degree centralization      | 0.077     | 0.065       | 0.078  | 0.065      | 0.078  | 0.070      | 0.072  | 0.069  | 0.051  |
| Closeness centralization   | 0.009     | 0.011       | 0.009  | 0.010      | 0.009  | 0.010      | 0.012  | 0.013  | 0.011  |
| Betweenness centralization | 0.111     | 0.150       | 0.151  | 0.149      | 0.151  | 0.148      | 0.156  | 0.160  | 0.224  |
